# Supplementary material for: Therapeutic Potential of Rituximab in Managing Hepatitis C-Associated Cryoglobulinemic Vasculitis: A Systematic Review
Source: MDPI journal article supplement (doi:10.3390/jcm12216806), 2023-10-27
Supplement: s1 [file s1]

**Table S2.** Quality assessment of cohort studies using Newcastle-Ottawa scale.

| Study                 | Representativeness of the exposed cohort | Selection of the non-exposed cohort | Ascertainment of exposure | Presence of outcome of interest at the start | Comparability of cohorts | Assessment of outcome | Follow-up long enough for outcomes to occur | Adequacy of follow-up | Total |
|-----------------------|------------------------------------------|-------------------------------------|---------------------------|----------------------------------------------|--------------------------|-----------------------|---------------------------------------------|-----------------------|-------|
| Ignatova, 2017 [24]   | *                                        | *                                   | *                         | *                                            | *                        |                       | *                                           |                       | 6     |
| Petrarca, 2010 [25]   | *                                        | NA                                  | *                         | *                                            | NA                       | *                     | *                                           | *                     | 6     |
| Quartuccio, 2015 [26] | *                                        | NA                                  | *                         | *                                            | NA                       | *                     | *                                           | *                     | 6     |
| Saadoun, 2008 [27]    | *                                        | NA                                  | *                         | *                                            | NA                       | *                     | *                                           | *                     | 6     |
| Sansonno, 2003 [28]   | *                                        | NA                                  | *                         | *                                            | NA                       |                       | *                                           | *                     | 5     |
| Sene, 2009 [30]       | *                                        | NA                                  | *                         | *                                            | NA                       | *                     |                                             | *                     | 5     |
| Visentini, 2015 [31]  | *                                        | NA                                  | *                         | *                                            | NA                       | *                     | *                                           | *                     | 6     |

Good quality: 3 or 4 stars in selection domain AND 1 or 2 stars in comparability domain AND 2 or 3 stars in outcome/exposure domain. Fair quality: 2 stars in selection domain AND 1 or 2 stars in comparability domain AND 2 or 3 stars in outcome/exposure domain. Poor quality: 0 or 1 star in selection domain OR 0 stars in comparability domain OR 0 or 1 stars in outcome/exposure domain.
