# Supplementary material for: Therapeutic Potential of Rituximab in Managing Hepatitis C-Associated Cryoglobulinemic Vasculitis: A Systematic Review
Source: MDPI journal article supplement (doi:10.3390/jcm12216806), 2023-10-27
Supplement: s1 [file s1]

**Table S1.** Databases and search strategies used in present systematic review.

| Database             | Coverage        | Search run                                                                                                                                                                                                                                                                                                                                                                                                                            | Records |
|----------------------|-----------------|---------------------------------------------------------------------------------------------------------------------------------------------------------------------------------------------------------------------------------------------------------------------------------------------------------------------------------------------------------------------------------------------------------------------------------------|---------|
| MEDLINE              | 1946 to present | ("Rituximab"[Mesh]OR monoclonal antibody OR immunotherapy OR biologic agents) AND ("Cryoglobulinemia"[Mesh] OR mixed cryoglobulinemia OR mixed essential cryoglobulinemia OR cryoglobulinemic vasculitis) AND (hepatitis C OR hepatitis C-induced vasculitis OR hepatitis C-associated cryoglobulinemia) AND (efficacy OR safety OR response rate OR remission OR clinical improvement OR outcomes OR adverse events OR side effects) | 317     |
|                      |                 | ("Rituximab"[Mesh] OR monoclonal antibody OR immunotherapy OR biologic agents) AND ("Cryoglobulinemia"[Mesh] OR mixed cryoglobulinemia OR mixed essential cryoglobulinemia OR cryoglobulinemic vasculitis) AND (hepatitis C OR hepatitis C-induced vasculitis OR hepatitis C-associated cryoglobulinemia)                                                                                                                             | 825     |
|                      |                 | ("Rituximab"[Mesh]) AND ("Cryoglobulinemia"[Mesh] OR cryoglobulinemic vasculitis) AND (hepatitis C OR hepatitis C-induced vasculitis OR hepatitis C-associated cryoglobulinemia)                                                                                                                                                                                                                                                      | 123     |
| Total records = 1265 |                 |                                                                                                                                                                                                                                                                                                                                                                                                                                       |         |
| Embase               | 1966 to present | ('rituximab'/exp OR monoclonal antibody OR immunotherapy OR biologic agents) AND ('cryoglobulinemia'/exp OR mixed cryoglobulinemia OR mixed essential cryoglobulinemia OR cryoglobulinemic vasculitis) AND (hepatitis C OR hepatitis C-induced vasculitis OR hepatitis C-associated cryoglobulinemia) AND (efficacy OR safety OR response rate OR remission OR clinical improvement OR outcomes OR adverse events OR side effects)    | 1       |
|                      |                 | ('rituximab'/exp OR monoclonal antibody OR immunotherapy OR biologic agents) AND ('cryoglobulinemia'/exp OR mixed cryoglobulinemia OR mixed essential cryoglobulinemia OR cryoglobulinemic vasculitis) AND (hepatitis C OR hepatitis C-induced vasculitis OR hepatitis C-associated cryoglobulinemia)                                                                                                                                 | 2       |
|                      |                 | (Rituximab) AND (Cryoglobulinemia OR cryoglobulinemic vasculitis) AND (hepatitis C OR hepatitis C-induced vasculitis OR hepatitis C-associated cryoglobulinemia)                                                                                                                                                                                                                                                                      | 725     |
| Total records = 728  |                 |                                                                                                                                                                                                                                                                                                                                                                                                                                       |         |
| Cochrane library     | 1967 to present | (Rituximab OR monoclonal antibody OR immunotherapy OR biologic agents) AND (Cryoglobulinemia OR mixed cryoglobulinemia OR mixed essential cryoglobulinemia OR cryoglobulinemic vasculitis) AND (hepatitis C OR hepatitis C-induced vasculitis OR hepatitis C-associated cryoglobulinemia) AND (efficacy OR safety OR response rate OR remission OR clinical improvement OR outcomes OR adverse events OR side effects)                | 12      |
|                      |                 | (Rituximab OR monoclonal antibody OR immunotherapy OR biologic agents) AND (Cryoglobulinemia OR mixed cryoglobulinemia OR mixed essential cryoglobulinemia OR cryoglobulinemic vasculitis) AND (hepatitis C OR hepatitis C-induced vasculitis OR hepatitis C-associated cryoglobulinemia)                                                                                                                                             | 13      |

|                             |                                 |                                                                                                                                                                                                                                                                                                                                                                                                                        |    |
|-----------------------------|---------------------------------|------------------------------------------------------------------------------------------------------------------------------------------------------------------------------------------------------------------------------------------------------------------------------------------------------------------------------------------------------------------------------------------------------------------------|----|
|                             |                                 | (Rituximab) AND (Cryoglobulinemia OR cryoglobulinemic vasculitis) AND (hepatitis C OR hepatitis C-induced vasculitis OR hepatitis C-associated cryoglobulinemia)                                                                                                                                                                                                                                                       | 10 |
|                             |                                 | Total records = 35                                                                                                                                                                                                                                                                                                                                                                                                     |    |
| Scopus                      | From the inception till present | (Rituximab OR monoclonal antibody OR immunotherapy OR biologic agents) AND (Cryoglobulinemia OR mixed cryoglobulinemia OR mixed essential cryoglobulinemia OR cryoglobulinemic vasculitis) AND (hepatitis C OR hepatitis C-induced vasculitis OR hepatitis C-associated cryoglobulinemia) AND (efficacy OR safety OR response rate OR remission OR clinical improvement OR outcomes OR adverse events OR side effects) | 0  |
|                             |                                 | (Rituximab OR monoclonal antibody OR immunotherapy OR biologic agents) AND (Cryoglobulinemia OR mixed cryoglobulinemia OR mixed essential cryoglobulinemia OR cryoglobulinemic vasculitis) AND (hepatitis C OR hepatitis C-induced vasculitis OR hepatitis C-associated cryoglobulinemia)                                                                                                                              | 0  |
|                             |                                 | (Rituximab) AND (Cryoglobulinemia OR cryoglobulinemic vasculitis) AND (hepatitis C OR hepatitis C-induced vasculitis OR hepatitis C-associated cryoglobulinemia)                                                                                                                                                                                                                                                       | 0  |
|                             |                                 | Total records = 0                                                                                                                                                                                                                                                                                                                                                                                                      |    |
| All databases: 2028 records |                                 |                                                                                                                                                                                                                                                                                                                                                                                                                        |    |
